# Supplementary material
Source: HighWire-hosted journal article supplement (https://cmajopen-stage.highwire.org/highwire/filestream/88282/field_highwire_adjunct_files/0/open-2021-0019-1-at.pdf)
Supplement: open-2021-0019-1-at.pdf [file open-2021-0019-1-at.pdf]

## Appendix

### Appendix 1. Description of baseline characteristics described for Cohort 1 and 2.

Baseline characteristics included sociodemographic and socioeconomic factors: sex, age (45-60, 61-70 and 71-85 years), immigration status (yes/no), ethnic/racial background (White, Black, South Asian, Chinese and Other), marital status (widowed, divorced or separated), language most spoken at home (French, English and other), household income (Can\$, <20,000; 20,000-50,000; 50,000-100,000 and >100,000), employment status (employed, unemployed and completely or partly retired), education (post-secondary, secondary, <secondary), province (Ontario, British Columbia, Quebec, and other provinces [Alberta, Manitoba, Nova Scotia, Prince Edward Island, Newfoundland and Labrador, Saskatchewan]), and place of residence (urban or rural based on postal code areas with rural having <10,000 people) (1, 2); common medical conditions: living with pain, history of cancer, arthritis, bowel disorders (Crohn's disease, ulcerative colitis or irritable bowel syndrome), myocardial infarction, heart disease, and hypertension; perceived health ("poor", "fair", "good", "very good" or "excellent"), sleep satisfaction (satisfied/very satisfied, neutral, dissatisfied/very dissatisfied); personal health choices: alcohol consumption (no, occasional or regular) in the past year, smoking status (current, former and never); anthropomorphic measurements: World Health Organization (WHO) classification for adults aged  $\geq 18$  years of body mass index (BMI) (3) and of waist circumference (WC) risk status (high risk, men:  $\geq 102$  cm women:  $\geq 88$ cm) (4); Nutritional risk scored using AB SCREEN<sup>TM</sup> II (high and low risk) (5); and weight change ("Compared with 6 months ago, have you gained weight, lost weight, or stayed about the same?"); laboratory test results: vitamin D deficiency (<30 nmol/L), iron deficiency (Ferritin  $\geq 30$   $\mu$ g/L), high triglycerides ( $\geq 1.7$  mmol/L), high low density lipoprotein (LDL,  $\geq 5$  mmol/L), high non high density lipoprotein (nHDL,  $\geq 4.3$  nmol/L); DEXA-measured [total lean mass (without bone, kg/m<sup>2</sup>) and total fat mass (kg/m<sup>2</sup>)].

**Table 1: Baseline characteristics of Cohort 1 study individuals with and without baseline diabetes by immigration status**

|                               | Immigrant (N=3,766)            |                                     |                            | Non-immigrant (N=16,957)         |                                      |                               |
|-------------------------------|--------------------------------|-------------------------------------|----------------------------|----------------------------------|--------------------------------------|-------------------------------|
|                               | Diabetes<br>( N= 616)<br>N (%) | No Diabetes<br>( N= 3,150)<br>N (%) | OR (95% CI)*<br>(N= 3,766) | Diabetes<br>( N= 2,639)<br>N (%) | No Diabetes<br>( N= 14,318)<br>N (%) | OR (95% CI)* *<br>(N= 16,957) |
| Age, years                    |                                |                                     |                            |                                  |                                      |                               |
| 45-60                         | 141 (22.9)                     | 1,173 (37.2)                        | 1                          | 893 (33.8)                       | 7,050 (49.2)                         | 1                             |
| 61-70                         | 236 (38.3)                     | 1,050 (33.3)                        | 1.30 (0.88 - 1.92)         | 969 (36.7)                       | 4,224 (29.5)                         | 1.06 (0.91 -1.25)             |
| 71-85                         | 239 (38.8)                     | 927 (29.4)                          | 1.24 (0.79 - 1.96)         | 777 (29.4)                       | 3,044 (21.3)                         | 0.91 (0.75 - 1.11)            |
| Sex                           |                                |                                     |                            |                                  |                                      |                               |
| Male                          | 408 (66.2)                     | 1,743 (55.3)                        | 1                          | 1,551 (58.8)                     | 7,167 (50.1)                         | 1                             |
| Female                        | 208 (33.8)                     | 1,407 (44.7)                        | 0.70 (0.53 - 0.92)         | 1,088 (41.2)                     | 7,151 (49.9)                         | 0.74 (0.65 - 0.84)            |
| Marital status                |                                |                                     |                            |                                  |                                      |                               |
| Single                        | 27 (4.4)                       | 149 (4.7)                           |                            | 234 (8.9)                        | 1,176 (8.2)                          |                               |
| Married                       | 455 (73.9)                     | 2,405 (76.3)                        | -                          | 1,834 (69.5)                     | 10,407 (72.7)                        | -                             |
| Widowed/divorced/separated    | 134 (21.8)                     | 595 (18.9)                          | -                          | 571 (21.6)                       | 2,731 (19.1)                         | -                             |
| Language most spoken at home  |                                |                                     |                            |                                  |                                      |                               |
| French                        | 31 (5.0)                       | 205 (6.5)                           |                            | 541 (20.5)                       | 3,171 (22.1)                         |                               |
| English                       | 492 (79.9)                     | 2,597 (82.4)                        | -                          | 2,092 (79.3)                     | 11,114 (77.6)                        | -                             |
| Other                         | 55 (8.9)                       | 254 (8.1)                           |                            | 3 (0.1)                          | 17 (0.1)                             |                               |
| Years since arrival to Canada |                                |                                     |                            |                                  |                                      |                               |
| <20                           | 42 (3.4)                       | 396 (12.6)                          | -                          | -                                | -                                    | -                             |
| 20-40                         | 162 (26.2)                     | 781 (20.7)                          | -                          | -                                | -                                    | -                             |
| >40                           | 412 (66.9)                     | 1,973 (61.6)                        | -                          | -                                | -                                    | -                             |

Appendix 1, as supplied by the authors. Appendix to: Farid D, Li P, Da Costa D, et al. Depression, diabetes and immigration status: a retrospective cohort study using the Canadian Longitudinal Study on Aging. *CMAJ Open* 2022. DOI:10.9778/cmajo.20210019. Copyright © 2022 The Author(s) or their employer(s). To receive this resource in an accessible format, please contact us at [cmajgroup@cmaj.ca](mailto:cmajgroup@cmaj.ca).

|                                |            |              |                    |              |               |                    |
|--------------------------------|------------|--------------|--------------------|--------------|---------------|--------------------|
| Ethnic/racial background       |            |              |                    |              |               |                    |
| White                          | 464 (75.3) | 2,640 (83.8) | 1                  | 2,596 (98.4) | 14,166 (98.9) |                    |
| Black                          | 36 (5.8)   | 89 (2.8)     | 1.82 (0.91 - 3.62) | 8 (0.3)      | 19 (0.1)      | -                  |
| South Asian                    | 50 (8.1)   | 122 (3.9)    | 2.31 (1.33 - 4.03) | 0 (0.0)      | 6 (0.0)       | -                  |
| Chinese                        | 24 (3.9)   | 107 (3.4)    | 1.53 (0.82 - 2.84) | 8 (0.3)      | 37 (0.3)      | -                  |
| Other                          | 42 (6.8)   | 188 (6.0)    | 1.22 (0.69 - 2.17) | 25 (0.9)     | 80 (0.6)      | -                  |
| Total household income (CAD\$) |            |              |                    |              |               |                    |
| <20,000                        | 29 (4.7)   | 82 (2.6)     |                    | 140 (5.3)    | 432 (3.0)     | 1                  |
| 20,000-50,000                  | 141 (22.9) | 589 (18.7)   | -                  | 641 (24.3)   | 2,435 (17.0)  | 0.94 (0.69 - 1.29) |
| 50,000-100,000                 | 245 (39.8) | 1,076 (34.2) | -                  | 927 (35.1)   | 4,786 (33.4)  | 0.75 (0.55 - 1.02) |
| >100,000                       | 163 (26.5) | 1,180 (37.5) | -                  | 779 (29.5)   | 5,855 (40.9)  | 0.65 (0.47 - 0.89) |
| Working status                 |            |              |                    |              |               |                    |
| Employed                       | 158 (25.6) | 1,333 (42.3) | 1                  | 826 (31.3)   | 6,368 (44.5)  | 1                  |
| Unemployed                     | 29 (4.7)   | 111 (3.5)    | 2.65 (1.38 - 5.09) | 72 (2.7)     | 468 (3.3)     | 0.76 (0.52 - 1.10) |
| Retired                        | 429 (69.6) | 1,699 (53.9) | 1.45 (1.01 - 2.09) | 1,732 (65.6) | 7,453 (52.1)  | 1.17 (1.00 - 1.37) |
| Education level                |            |              |                    |              |               |                    |
| < Secondary school             | 20 (3.2)   | 77 (2.4)     |                    | 188 (7.1)    | 590 (4.1)     |                    |
| Secondary school               | 51 (8.3)   | 195 (6.2)    | -                  | 316 (12.0)   | 1,275 (8.9)   | -                  |
| Post-secondary degree/diploma  | 541 (87.8) | 2,870 (91.1) | -                  | 2,134 (80.9) | 12,436 (86.9) | -                  |
| Place of residence***          |            |              |                    |              |               |                    |
| Rural                          | 58 (9.4)   | 310 (9.8)    |                    | 365 (13.8)   | 1,849 (12.9)  | 1                  |
| Urban                          | 551 (89.4) | 2,799 (88.9) | -                  | 2,239 (84.8) | 12,303 (85.9) | 0.75 (0.63 - 0.90) |
| Province                       |            |              |                    |              |               |                    |
| Quebec                         | 65 (10.6)  | 365 (11.6)   | 1                  | 536 (20.3)   | 3,199 (22.3)  | 1                  |
| British Columbia               | 189 (30.7) | 996 (31.6)   | 1.24 (0.78 - 1.97) | 538 (20.4)   | 2,736 (19.1)  | 1.81 (1.48 - 2.21) |
| Ontario                        | 169 (27.4) | 869 (27.6)   | 0.80 (0.50 - 1.29) | 551 (20.9)   | 2,920 (20.4)  | 1.34 (1.10 - 1.62) |
| Other****                      | 193 (31.3) | 920 (29.2)   | 0.84 (0.52 - 1.34) | 1,014 (38.4) | 5,463 (38.2)  | 1.21 (1.02 - 1.44) |
| Perceived health               |            |              |                    |              |               |                    |
| Poor                           | 13 (2.1)   | 16 (0.5)     |                    | 31 (1.2)     | 39 (0.3)      |                    |
| Fair                           | 54 (8.8)   | 106 (3.4)    | -                  | 264 (10.0)   | 518 (3.6)     | -                  |

Appendix 1, as supplied by the authors. Appendix to: Farid D, Li P, Da Costa D, et al. Depression, diabetes and immigration status: a retrospective cohort study using the Canadian Longitudinal Study on Aging. *CMAJ Open* 2022. DOI:10.9778/cmajo.20210019. Copyright © 2022 The Author(s) or their employer(s). To receive this resource in an accessible format, please contact us at [cmajgroup@cmaj.ca](mailto:cmajgroup@cmaj.ca).

|                                   |            |              |                     |              |               |                    |
|-----------------------------------|------------|--------------|---------------------|--------------|---------------|--------------------|
| Good                              | 253 (41.1) | 806 (25.6)   | -                   | 1,075 (40.7) | 3,321 (23.2)  | -                  |
| Very good                         | 211 (34.3) | 1,384 (43.9) | -                   | 972 (36.8)   | 6,708 (46.9)  | -                  |
| Excellent                         | 84 (13.6)  | 836 (26.5)   | -                   | 295 (11.2)   | 3,724 (26.0)  | -                  |
| Medical conditions                |            |              |                     |              |               |                    |
| Living with pain                  | 226 (36.7) | 944 (30.0)   | -                   | 1,055 (40.0) | 4,260 (29.8)  | 1.20 (1.06 - 1.37) |
| Bowel disorders                   | 41 (6.7)   | 227 (7.2)    | -                   | 224 (8.5)    | 1,135 (7.9)   | -                  |
| Arthritis                         | 16 (2.6)   | 83 (2.6)     | -                   | 109 (4.1)    | 355 (2.5)     | -                  |
| Heart disease                     | 370 (60.1) | 1,007 (32.0) | 1.93 (1.39 - 2.67)  | 1,552 (58.8) | 4,353 (30.4)  | 1.85 (1.59 - 2.14) |
| Kidney disease                    | 36 (5.8)   | 66 (2.1)     | -                   | 111 (4.2)    | 292 (2.0)     | -                  |
| Stroke                            | 11 (1.8)   | 36 (1.1)     | -                   | 65 (2.5)     | 157 (1.1)     | -                  |
| Cancer                            | 95 (15.4)  | 475 (15.1)   | -                   | 465 (17.6)   | 2,005 (14.0)  | -                  |
| Hypertension                      | 355 (57.6) | 1,081 (34.3) | 1.56 (1.13 - 2.15)  | 1,530 (58.0) | 4,851 (33.9)  | 1.96 (1.68 - 2.28) |
| Anxiety disorder                  | 17 (2.8)   | 109 (3.5)    | -                   | 137 (5.2)    | 606 (4.2)     | -                  |
| Alcohol consumption               |            |              |                     |              |               |                    |
| Never                             | 92 (14.9)  | 309 (9.8)    | 1                   | 340 (12.9)   | 1,209 (8.4)   | 1                  |
| About once a month                | 141 (22.9) | 514 (16.3)   | 0.93 ( 0.62 - 1.38) | 608 (23.0)   | 2,255 (15.7)  | 0.98 (0.79 - 1.23) |
| 2-4 times a month                 | 115 (18.7) | 576 (18.3)   | 0.66 (0.42 - 1.05)  | 588 (22.3)   | 3,160 (22.1)  | 0.77 (0.62 - 0.95) |
| >2 times a week                   | 239 (38.8) | 1,641 (52.1) | 0.52 (0.35 - 0.77)  | 1,031 (39.1) | 7,433 (51.9)  | 0.60 (0.49 - 0.73) |
| Smoking status                    |            |              |                     |              |               |                    |
| Non smoker                        | 297 (48.2) | 1,691 (53.7) |                     | 1,088 (41.2) | 7,184 (50.2)  |                    |
| Former smoker                     | 275 (44.6) | 1,291 (41.0) | -                   | 1,348 (51.1) | 6,029 (42.1)  | -                  |
| Smoker                            | 44 (7.1)   | 168 (5.3)    | -                   | 203 (7.7)    | 1,105 (7.7)   | -                  |
| Sleep quality                     |            |              |                     |              |               |                    |
| Satisfied or very satisfied       | 373 (60.6) | 2,014 (63.9) |                     | 1,615 (61.2) | 9,114 (63.7)  |                    |
| Neutral                           | 116 (18.8) | 513 (16.3)   | -                   | 388 (14.7)   | 2,158 (15.1)  | -                  |
| Dissatisfied or very dissatisfied | 127 (20.6) | 617 (19.6)   | -                   | 635 (24.1)   | 3,038 (21.2)  | -                  |
| Nutritional risk status           |            |              |                     |              |               |                    |
| Low risk                          | 394 (64.0) | 2,256 (71.6) |                     | 1,577 (59.8) | 10,128 (70.7) | 1                  |
| High risk                         | 201 (32.6) | 796 (25.3)   | -                   | 1,008 (38.2) | 3,919 (27.4)  | 1.20 (1.04 - 1.38) |
| Waist circumference risk status   |            |              |                     |              |               |                    |

|                                      |            |              |                    |              |               |                    |
|--------------------------------------|------------|--------------|--------------------|--------------|---------------|--------------------|
| Low risk                             | 263 (42.7) | 2,128 (67.6) | 1                  | 908 (34.4)   | 8,966 (62.6)  | 1                  |
| High risk                            | 353 (57.3) | 1,022 (32.4) | 1.66 (1.18 - 2.34) | 1,731 (65.6) | 5,352 (37.4)  | 2.19 (1.92 - 2.50) |
| Weight classification †              |            |              |                    |              |               |                    |
| Normal weight                        | 112 (18.2) | 1,193 (37.9) | 1                  | 383 (14.5)   | 4,827 (33.7)  |                    |
| Overweight                           | 248 (40.3) | 1,312 (41.7) | 1.50 (1.04 – 2.16) | 967 (36.6)   | 6,086 (42.5)  | -                  |
| Obese                                | 253 (41.1) | 638 (20.3)   | 2.10 (1.33 - 3.32) | 1,277 (48.4) | 3,365 (23.5)  | -                  |
| Weight change ‡                      |            |              |                    |              |               |                    |
| Same weight                          | 401 (65.1) | 2,152 (68.3) |                    | 1,574 (59.6) | 9,693 (67.7)  | 1                  |
| Gained weight                        | 69 (11.2)  | 447 (14.2)   | -                  | 385 (14.6)   | 2,012 (14.1)  | 1.18 (0.98 - 1.41) |
| Lost weight                          | 132 (21.4) | 494 (15.7)   | -                  | 646 (24.5)   | 2,439 (17.0)  | 1.32 (1.13 - 1.55) |
| Laboratory tests                     |            |              |                    |              |               |                    |
| Vitamin D deficiency                 |            |              |                    |              |               |                    |
| ≥ 30 nmol/L                          | 522 (84.7) | 2,719 (86.3) |                    | 2,314 (87.7) | 12,807 (89.4) | 1                  |
| <30 nmol/L                           | 30 (4.9)   | 91 (2.9)     | -                  | 81 (3.1)     | 247 (1.7)     | 1.55 (1.08 – 1.22) |
| Iron deficiency                      |            |              |                    |              |               |                    |
| No                                   | 492 (79.9) | 2,607 (82.8) |                    | 2,180 (82.6) | 11,978 (83.7) |                    |
| Yes                                  | 46 (7.5)   | 159 (5.0)    | -                  | 147 (5.6)    | 878 (6.1)     | -                  |
| Triglycerides                        |            |              |                    |              |               |                    |
| <1.7 mmol/L                          | 281 (45.6) | 1,808 (57.4) | 1                  | 1,107 (41.9) | 8,090 (56.5)  | 1                  |
| ≥1.7 mmol/L                          | 271 (44.0) | 1,004 (31.9) | 1.55 (1.17 - 2.04) | 1,288 (48.8) | 4,965 (34.7)  | 1.52 (1.34 - 1.73) |
| Low density lipoprotein              |            |              |                    |              |               |                    |
| <5 mmol/L                            | 518 (84.1) | 2,715 (86.2) |                    | 2,271 (86.1) | 12,621 (88.1) |                    |
| ≥5 mmol/L                            | 8 (1.3)    | 61 (1.9)     | -                  | 16 (0.6)     | 219 (1.5)     | -                  |
| Non high density lipoprotein         |            |              |                    |              |               |                    |
| < 4.3 nmol/L                         | 448 (72.7) | 2,026 (64.3) | 1                  | 1,891 (71.7) | 9,529 (66.6)  | 1                  |
| ≥ 4.3 nmol/L                         | 78 (12.7)  | 750 (23.8)   | 0.49 (0.35 - 0.69) | 396 (15.0)   | 3,311 (23.1)  | 0.61 (0.52 - 0.72) |
|                                      | Mean (SD)  |              |                    | Mean (SD)    |               |                    |
| Total lean mass (kg/m <sup>2</sup> ) | 18.7 (2.7) | 17.3 (2.6)   | -                  | 18.9 (2.9)   | 17.7 (2.8)    | -                  |
| Total fat mass (kg/m <sup>2</sup> )  | 10.2 (3.7) | 8.7 (3.1)    | -                  | 11.0 (4.0)   | 9.3 (3.5)     | -                  |

SD=Standard Deviation

Diabetes at baseline was assessed with Hb1Ac  $\geq 7\%$  and/or a positive answer to “Has a doctor ever told you that you have diabetes, borderline diabetes or that your blood sugar is higher?”

\* Odds ratio derived from a multivariable logistic regression model comparing baseline characteristics of immigrant with diabetes versus immigrants without diabetes.

\*\* Odds ratio derived from a multivariable logistic regression model comparing baseline characteristics of non-immigrant with diabetes versus non-immigrants without diabetes.

\*\*\* The place of residence classification (urban or rural) was derived by CLSA based on Statistics Canada's Postal Code Conversion File where rural areas were those with a total population of less than 10,000.

\*\*\*\*Other provinces are Alberta, Manitoba, Nova Scotia, Prince Edward Island, Labrador and Saskatchewan

† Based on Body Mass Index international classification for adults  $\geq 18$  years of age.

‡ Weight change was defined by the question "Compared with 6 months ago, have you gained weight, lost weight, or stayed about the same?"

**Table 2: Sensitivity analysis of the association between baseline self-reported diabetes and depression at three years: Multivariable logistic regression models**

|                                                                        | Cohort 1: Depression incidence<br>N=20,695 |
|------------------------------------------------------------------------|--------------------------------------------|
|                                                                        | Adjusted OR (95% CI)                       |
| Diabetes* (Yes vs. no)                                                 | 1.26 (1.09 - 1.46)                         |
| <b>Interaction effect of immigrant status and diabetes at baseline</b> |                                            |
| Immigrant with diabetes versus immigrant without diabetes              | 1.14 (0.82 - 1.60)                         |
| Immigrant with diabetes versus non-immigrant with diabetes             | 1.03 (0.74 - 1.44)                         |
| Immigrant without diabetes versus non-immigrant without diabetes       | 1.16 (0.98 - 1.36)                         |
| Non-immigrant with diabetes versus non-immigrant without diabetes      | 1.28 (1.09 - 1.51)                         |
| Sex                                                                    |                                            |
| Male                                                                   | 1                                          |
| Female                                                                 | 1.65 (1.47 - 1.85)                         |
| Age, years,                                                            |                                            |
| 45 - 60                                                                | 1                                          |
| 61 - 70                                                                | 0.94 (0.82 - 1.07)                         |
| 71 - 85                                                                | 1.30 (1.13 - 1.48)                         |

|                                   |                    |
|-----------------------------------|--------------------|
| Province                          |                    |
| Quebec                            | 1                  |
| British Columbia                  | 0.68 (0.58 - 0.81) |
| Ontario                           | 0.65 (0.55 - 0.77) |
| Other                             | 0.78 (0.67 – 0.90) |
| Medical conditions (Yes vs. no)   |                    |
| Living with pain                  | 1.54 (1.56 – 1.97) |
| Bowel disorders                   | 1.75 (1.56 – 1.97) |
| Smoking status                    |                    |
| Smoker                            | 1                  |
| Former smoker                     | 0.51 (0.42 - 0.62) |
| Non-smoker                        | 0.46 (0.38 - 0.55) |
| Weight change †                   |                    |
| Same weight                       | 1                  |
| Gained weight                     | 1.31 (1.12 - 1.52) |
| Lost weight                       | 1.30 (1.12 - 1.51) |
| Sleep quality                     |                    |
| Satisfied or very satisfied       | 1                  |
| Neutral                           | 1.28 (1.10 - 1.50) |
| Dissatisfied or very dissatisfied | 1.86 (1.63 – 2.11) |

OR=Odds Ratio; CI=Confidence Interval;

\* The model adjusted for all the variables included in Table 1. Sex, age and immigration status were forced in the model. The variables that were not significant (p-value > 0.5), which inclusion did not affect the Bayesian Information Criterion and did not modify the effect of the main exposure variable by more than 10% were removed. Diabetes at baseline is assessed with a positive answer to “Has a doctor ever told you that you have diabetes, borderline diabetes or that your blood sugar is higher?” At 3-year follow-up, depression is defined using CES-D-10 score  $\geq 10$  or currently taking medication for depression for cohort1.

† Weight change is defined by the question "Compared with 6 months ago, have you gained weight, lost weight, or stayed about the same?"

**Table 3: Association between baseline diabetes and three-year depression incidence (Cohort 1) and between baseline depression and three-year diabetes incidence (Cohort 2)\*: Multivariable logistic regression models**

|                                                                          | Cohort 1: Depression incidence<br>N=20,723 | Cohort 2: Diabetes incidence<br>N=22,041 |
|--------------------------------------------------------------------------|--------------------------------------------|------------------------------------------|
|                                                                          | Adjusted OR (95% CI)                       |                                          |
| Diabetes* (Yes vs. no)                                                   | 1.18 (1.01 - 1.37)                         | NA                                       |
| Depression* (Yes vs. no)                                                 | NA                                         | 1.43 (1.21 - 1.68)                       |
| <b>Interaction effect of immigrant status and diabetes at baseline</b>   |                                            |                                          |
| Immigrant with Diabetes versus immigrant with No Diabetes                | 1.12 (0.80 - 1.56)                         | -                                        |
| Immigrant with Diabetes versus non-immigrant with Diabetes               | 1.01 (0.72 - 1.41)                         | -                                        |
| Immigrant with No Diabetes versus non-immigrant with No Diabetes         | 1.15 (0.98 - 1.35)                         | -                                        |
| Non-immigrant with Diabetes versus non-immigrant with No Diabetes        | 1.27 (1.08 - 1.49)                         | -                                        |
| <b>Interaction effect of immigrant status and depression at baseline</b> |                                            |                                          |
| Immigrant with Depression versus immigrant with No Depression            | -                                          | 1.60 (1.08 - 2.37)                       |
| Immigrant with Depression versus non-immigrant with Depression           | -                                          | 1.10 (0.76 - 1.58)                       |
| Immigrant with No Depression versus non-immigrant with No Depression     | -                                          | 0.96 (0.76 - 1.21)                       |
| Non-immigrant with Depression versus non-immigrant with No Depression    | -                                          | 1.39 (1.16 - 1.68)                       |
| Sex                                                                      |                                            |                                          |
| Male                                                                     | 1                                          | 1                                        |
| Female                                                                   | 1.55 (1.38 - 1.75)                         | 0.81 (0.70 - 0.94)                       |
| Age, years,                                                              |                                            |                                          |
| 45 - 60                                                                  | 1                                          | 1                                        |
| 61 - 70                                                                  | 0.86 (0.75 - 0.98)                         | 0.93 (0.79 - 1.10)                       |
| 71 - 85                                                                  | 1.08 (0.93 - 1.26)                         | 0.76 (0.62 - 0.94)                       |
| Province                                                                 |                                            |                                          |
| Quebec                                                                   | 1                                          | 1                                        |
| British Columbia                                                         | 0.75 (0.63 - 0.90)                         | 1.09 (0.88 - 1.37)                       |
| Ontario                                                                  | 0.73 (0.61 - 0.87)                         | 0.85 (0.68 - 1.05)                       |
| Other                                                                    | 0.86 (0.74 - 1.01)                         | 0.68 (0.56 - 0.84)                       |
| Medical conditions (Yes vs. no)                                          |                                            |                                          |
| Hypertension                                                             | -                                          | 1.34 (1.12 - 1.60)                       |
| Living with pain                                                         | 1.74 (1.54 - 1.96)                         | -                                        |
| Heart disease                                                            | -                                          | 1.40 (1.17 - 1.68)                       |

Appendix 1, as supplied by the authors. Appendix to: Farid D, Li P, Da Costa D, et al. Depression, diabetes and immigration status: a retrospective cohort study using the Canadian Longitudinal Study on Aging. *CMAJ Open* 2022. DOI:10.9778/cmajo.20210019. Copyright © 2022 The Author(s) or their employer(s). To receive this resource in an accessible format, please contact us at [cmajgroup@cmaj.ca](mailto:cmajgroup@cmaj.ca).



|                                       |                    |                    |
|---------------------------------------|--------------------|--------------------|
| Smoking status                        |                    |                    |
| Smoker                                | 1                  |                    |
| Former smoker                         | 0.53 (0.44 - 0.65) | -                  |
| Non-smoker                            | 0.49 (0.40 - 0.60) | -                  |
| Waist circumference risk (Yes vs. no) | -                  | 2.50 (2.13 - 2.92) |
| Weight change†                        |                    |                    |
| Same weight                           | 1                  | 1                  |
| Gained weight                         | 1.30 (1.11 - 1.53) | 1.22 (1.01 - 1.49) |
| Lost weight                           | 1.30 (1.12 - 1.51) | 1.34 (1.11 - 1.61) |
| Sleep quality                         |                    |                    |
| Satisfied or very satisfied           | 1                  |                    |
| Neutral                               | 1.31 (1.11 - 1.54) | -                  |
| Dissatisfied or very dissatisfied     | 1.90 (1.66 - 2.18) | -                  |

OR=Odds Ratio; CI=Confidence Interval;

\* The model included all the variables listed in Table 1. Sex, age and immigration status were forced in the model. The variables that were not significant ( $p$ -value  $> 0.5$ ), which inclusion did not affect the Bayesian Information Criterion and did not modify the effect of the main exposure variable by more than 10% were removed. Depression was assessed with Center for Epidemiological Studies Depression 10 Scale, CESD  $\geq 10$  and/or currently undergoing treatment for depression. Diabetes at baseline was assessed with Hb1Ac  $\geq 7\%$  and/or positive answer to “Has a doctor ever told you that you have diabetes, borderline diabetes or that your blood sugar is higher?” At 3-year follow-up, depression was defined using CES-D-10 score  $\geq 10$  and/or currently taking medication for depression for Cohort 1. For Cohort 2, 3-year incident diabetes is defined using self-reported diabetes diagnosis.

† Weight change was defined by the question "Compared with 6 months ago, have you gained weight, lost weight, or stayed about the same?"

**Table 4: Baseline characteristics of Cohort 2 study individuals with and without depression by immigration status**

|                               | Immigrant (N=3,913)              |                                          |                            | Non-immigrant (N=18,141)           |                                           |                              |
|-------------------------------|----------------------------------|------------------------------------------|----------------------------|------------------------------------|-------------------------------------------|------------------------------|
|                               | Depression<br>( N= 762)<br>N (%) | No<br>Depression<br>( N= 3,151)<br>N (%) | OR (95% CI)*<br>(N= 3,913) | Depression<br>( N= 3,797)<br>N (%) | No<br>Depression<br>( N= 14,344)<br>N (%) | OR (95% CI)**<br>(N= 18,141) |
| Age, y                        |                                  |                                          |                            |                                    |                                           |                              |
| 45-60                         | 325 (42.7)                       | 1,173 (37.2)                             | 1                          | 1,941 (51.1)                       | 7,053 (49.2)                              | 1                            |
| 61-70                         | 235 (30.8)                       | 1,048 (33.3)                             | 0.62 (0.46 – 0.84)         | 1,087 (28.6)                       | 4,228 (29.5)                              | 0.79 (0.70 - 0.90)           |
| 71-85                         | 202 (26.5)                       | 930 (29.5)                               | 0.46 (0.32 - 0.66)         | 769 (20.3)                         | 3,063 (21.4)                              | 0.63 (0.54 - 0.74)           |
| Sex                           |                                  |                                          |                            |                                    |                                           |                              |
| Male                          | 266 (34.9)                       | 1,741 (55.3)                             | 1                          | 1,351 (35.6)                       | 7,175 (50.0)                              | 1                            |
| Female                        | 496 (65.1)                       | 1,410 (44.7)                             | 1.87 (1.50 - 2.33)         | 2,446 (64.4)                       | 7,169 (50.0)                              | 1.53 (1.39 - 1.69)           |
| Marital status                |                                  |                                          |                            |                                    |                                           |                              |
| Single                        | 68 (8.9)                         | 149 (4.7)                                | 1                          | 485 (12.8)                         | 1,178 (8.2)                               | 1                            |
| Married                       | 465 (61.0)                       | 2,403 (76.3)                             | 0.60 (0.41 - 0.88)         | 2,223 (58.5)                       | 10,417 (72.6)                             | 0.81 (0.69 - 0.95)           |
| Widowed/divorced/separated    | 227 (29.8)                       | 598 (19.0)                               | 0.79 (0.52 - 1.18)         | 1,088 (28.7)                       | 2,745 (19.1)                              | 1.01 (0.86 - 1.19)           |
| Language most spoken at home  |                                  |                                          |                            |                                    |                                           |                              |
| French                        | 65 (8.5)                         | 205 (6.5)                                |                            | 925 (24.4)                         | 3,174 (22.1)                              |                              |
| English                       | 597 (78.3)                       | 2,598 (82.5)                             | -                          | 2,861 (75.3)                       | 11,137 (77.6)                             | -                            |
| Other                         | 58 (7.6)                         | 254 (8.1)                                |                            | 7 (0.2)                            | 17 (0.1)                                  |                              |
| Years since arrival to Canada |                                  |                                          |                            |                                    |                                           |                              |
| <20                           | 112 (14.7)                       | 395 (12.5)                               | -                          | -                                  | -                                         | -                            |
| 20-40                         | 190 (24.9)                       | 783 (24.8)                               | -                          | -                                  | -                                         | -                            |
| >40                           | 460 (60.4)                       | 1,973 (62.6)                             | -                          | -                                  | -                                         | -                            |
| Ethnic/racial background      |                                  |                                          |                            |                                    |                                           |                              |
| White                         | 629 (82.5)                       | 2,641 (83.8)                             |                            | 3,758 (99.0)                       | 14,191 (98.9)                             |                              |

|                                |            |              |                    |              |               |                    |
|--------------------------------|------------|--------------|--------------------|--------------|---------------|--------------------|
| Black                          | 24 (3.1)   | 89 (2.8)     | -                  | 8 (0.2)      | 19 (0.1)      | -                  |
| South Asian                    | 36 (4.7)   | 122 (3.9)    | -                  | 2 (0.1)      | 6 (0.0)       | -                  |
| Chinese                        | 17 (2.2)   | 107 (3.4)    | -                  | 7 (0.2)      | 37 (0.3)      | -                  |
| Other                          | 53 (7.0)   | 188 (6.0)    | -                  | 20 (0.5)     | 81 (0.6)      | -                  |
| Total household income (CAD\$) |            |              |                    |              |               |                    |
| <20,000                        | 57 (7.5)   | 82 (2.6)     | 1                  | 332 (8.7)    | 436 (3.0)     | 1                  |
| 20,000-50,000                  | 208 (27.3) | 591 (18.8)   | 0.59 (0.34 - 1.01) | 923 (24.3)   | 2,443 (17.0)  | 0.74 (0.60 - 0.90) |
| 50,000-100,000                 | 246 (32.3) | 1,075 (34.1) | 0.45 (0.26 - 0.79) | 1,217 (32.1) | 4,794 (33.4)  | 0.60 (0.49 - 0.74) |
| >100,000                       | 194 (25.5) | 1,180 (37.4) | 0.37 (0.21 - 0.66) | 1,088 (28.7) | 5,854 (40.8)  | 0.52 (0.41 - 0.65) |
| Working status                 |            |              |                    |              |               |                    |
| Employed                       | 297 (39.0) | 1,332 (42.3) | 1                  | 1,510 (39.8) | 6,373 (44.4)  | 1                  |
| Unemployed                     | 71 (9.3)   | 111 (3.5)    | 2.22 (1.49 - 3.31) | 313 (8.2)    | 468 (3.3)     | 1.83 (1.50 - 1.24) |
| Retired                        | 393 (51.6) | 1,701 (54.0) | 1.26 (0.92 - 1.71) | 1,964 (51.7) | 7,474 (52.1)  | 1.10 (0.97 - 1.24) |
| Education level                |            |              |                    |              |               |                    |
| < Secondary school             | 30 (3.9)   | 76 (2.4)     |                    | 260 (6.8)    | 595 (4.1)     |                    |
| Secondary school               | 64 (8.4)   | 196 (6.2)    | -                  | 367 (9.7)    | 1,278 (8.9)   | -                  |
| Post-secondary degree/diploma  | 664 (87.1) | 2,871 (91.1) | -                  | 3,166 (83.4) | 12,454 (86.8) | -                  |
| Place of residence ***         |            |              |                    |              |               |                    |
| Rural                          | 75 (9.8)   | 310 (9.8)    |                    | 453 (11.9)   | 1,850 (12.9)  | 1                  |
| Urban                          | 674 (88.5) | 2,800 (88.9) | -                  | 3,293 (86.7) | 12,328 (85.9) | 0.75 (0.63 - 0.90) |
| Province                       |            |              |                    |              |               |                    |
| Quebec                         | 111 (14.6) | 365 (11.6)   | 1                  | 922 (24.3)   | 3,204 (22.3)  | 1                  |
| British Columbia               | 227 (29.8) | 995 (31.6)   | 0.84 (0.61 - 1.16) | 665 (17.5)   | 2,735 (19.1)  | 0.90 (0.78 - 1.05) |
| Ontario                        | 223 (29.3) | 872 (27.7)   | 1.11 (0.80 - 1.54) | 855 (22.5)   | 2,921 (20.4)  | 1.15 (1.00 - 1.31) |
| Other****                      | 201 (26.4) | 919 (29.2)   | 0.93 (0.67 - 1.30) | 1,355 (35.7) | 5,484 (38.2)  | 0.92 (0.81 - 1.04) |
| Perceived health               |            |              |                    |              |               |                    |
| Poor                           | 25 (3.3)   | 16 (0.5)     |                    | 125 (3.3)    | 39 (0.3)      |                    |
| Fair                           | 115 (15.1) | 108 (3.4)    | -                  | 480 (12.6)   | 518 (3.6)     | -                  |
| Good                           | 280 (36.7) | 807 (25.6)   | -                  | 1,389 (36.6) | 3,331 (23.2)  | -                  |
| Very good                      | 251 (32.9) | 1,383 (43.9) | -                  | 1,371 (36.1) | 6,714 (46.8)  | -                  |
| Excellent                      | 90 (11.8)  | 835 (26.5)   | -                  | 431 (11.4)   | 3,734 (26.0)  | -                  |

|                                   |            |              |                    |              |               |                    |
|-----------------------------------|------------|--------------|--------------------|--------------|---------------|--------------------|
| Medical conditions                |            |              |                    |              |               |                    |
| Living with pain                  | 366 (48.0) | 945 (30.0)   | 1.69 (1.37 - 2.08) | 1,904 (50.1) | 4,267 (29.7)  | 1.71 (1.55 - 1.88) |
| Bowel disorders                   | 105 (13.8) | 227 (7.2)    | 1.52 (1.07 - 2.17) | 582 (15.3)   | 1,136 (7.9)   | 1.61 (1.40 - 1.85) |
| Arthritis                         | 28 (3.7)   | 83 (2.6)     | -                  | 160 (4.2)    | 354 (2.5)     | -                  |
| Stroke                            | 15 (2.0)   | 37 (1.2)     | -                  | 67 (1.8)     | 157 (1.1)     | -                  |
| Cancer                            | 117 (15.4) | 474 (15.0)   | -                  | 573 (15.1)   | 2,012 (14.0)  | -                  |
| Hypertension                      | 283 (37.1) | 1,080 (34.3) | -                  | 1,457 (38.4) | 4,870 (34.0)  | -                  |
| Anxiety disorder                  | 119 (15.6) | 109 (3.5)    | -                  | 919 (24.2)   | 611 (4.3)     | -                  |
| Alcohol consumption               |            |              |                    |              |               |                    |
| Never                             | 101 (13.3) | 310 (9.8)    |                    | 528 (13.9)   | 1,218 (8.5)   | 1                  |
| About once a month                | 171 (22.4) | 512 (16.2)   | -                  | 756 (19.9)   | 2,259 (15.7)  | 0.71 (0.60 - 0.84) |
| 2-4 times a month                 | 150 (19.7) | 574 (18.2)   | -                  | 827 (21.8)   | 3,166 (22.1)  | 0.71 (0.60 - 0.83) |
| >2 times a week                   | 310 (40.7) | 1,645 (52.2) | -                  | 1,625 (42.8) | 7,436 (51.8)  | 0.67 (0.58 - 0.78) |
| Smoking status                    |            |              |                    |              |               |                    |
| Non smoker                        | 377 (49.5) | 1,690 (53.6) |                    | 1,644 (43.3) | 7,200 (50.2)  |                    |
| Former smoker                     | 315 (41.3) | 1,293 (41.0) | -                  | 1,690 (44.5) | 6,040 (42.1)  | -                  |
| Smoker                            | 70 (9.2)   | 168 (5.3)    | -                  | 463 (12.2)   | 1,104 (7.7)   | -                  |
| Sleep quality                     |            |              |                    |              |               |                    |
| Satisfied or very satisfied       | 339 (44.5) | 2,014 (63.9) | 1                  | 1,692 (44.6) | 9,133 (63.7)  | 1                  |
| Neutral                           | 132 (17.3) | 513 (16.3)   | 1.42 (1.06 - 1.89) | 588 (15.5)   | 2,162 (15.1)  | 1.39 (1.22 - 1.59) |
| Dissatisfied or very dissatisfied | 291 (38.2) | 618 (19.6)   | 2.57 (2.04 - 3.24) | 1,512 (39.8) | 3,041 (21.2)  | 2.04 (1.84 - 2.26) |
| Nutritional risk status           |            |              |                    |              |               |                    |
| Low risk                          | 381 (50.0) | 2,256 (71.6) | 1                  | 1,772 (46.7) | 10,147 (70.7) | 1                  |
| High risk                         | 356 (46.7) | 797 (25.3)   | 1.74 (1.41 - 2.15) | 1,941 (51.1) | 3,924 (27.4)  | 2.07 (1.88 - 2.28) |
| Waist circumference risk status   |            |              |                    |              |               |                    |
| Low risk                          | 475 (62.3) | 2,129 (67.6) |                    | 2,030 (53.5) | 8,983 (62.6)  | 1                  |
| High risk                         | 287 (37.7) | 1,022 (32.4) | -                  | 1,767 (46.5) | 5,361 (37.4)  | 1.09 (0.99 - 1.20) |
| Weight classification †           |            |              |                    |              |               |                    |
| Normal weight                     | 264 (34.6) | 1,194 (37.9) |                    | 1,205 (31.7) | 4,838 (33.7)  |                    |
| Overweight                        | 310 (40.7) | 1,313 (41.7) | -                  | 1,423 (37.5) | 6,094 (42.5)  | -                  |
| Obese                             | 184 (24.1) | 637 (20.2)   | -                  | 1,144 (30.1) | 3,372 (23.5)  | -                  |

|                                      |            |              |   |              |               |   |
|--------------------------------------|------------|--------------|---|--------------|---------------|---|
| Weight change ‡                      |            |              |   |              |               |   |
| Same weight                          | 442 (58.0) | 2,150 (68.2) |   | 2,204 (58.0) | 9,707 (67.7)  |   |
| Gained weight                        | 157 (20.6) | 449 (14.2)   | - | 810 (21.3)   | 2,020 (14.1)  | - |
| Lost weight                          | 149 (19.6) | 495 (15.7)   | - | 725 (19.1)   | 2,442 (17.0)  | - |
| Laboratory tests                     |            |              |   |              |               |   |
| Vitamin D deficiency                 |            |              |   |              |               |   |
| ≥ 30 nmol/L                          | 633 (83.1) | 2,721 (86.4) |   | 3,309 (87.1) | 12,827 (89.4) | - |
| <30 nmol/L                           | 25 (3.3)   | 90 (2.9)     | - | 89 (2.3)     | 247 (1.7)     | - |
| Triglycerides                        |            |              |   |              |               |   |
| <1.7 mmol/L                          | 402 (52.8) | 1,807 (57.3) |   | 1,951 (51.4) | 8,101 (56.5)  |   |
| ≥1.7 mmol/L                          | 256 (33.6) | 1,006 (31.9) | - | 1,448 (38.1) | 4,974 (34.7)  | - |
| Low density lipoprotein              |            |              |   |              |               |   |
| <5 mmol/L                            | 632 (82.9) | 2,715 (86.2) |   | 3,253 (85.7) | 12,641 (88.1) |   |
| ≥5 mmol/L                            | 17 (2.2)   | 62 (2.0)     | - | 75 (2.0)     | 219 (1.5)     | - |
| Non high density lipoprotein         |            |              |   |              |               |   |
| < 4.3 nmol/L                         | 474 (62.2) | 2,026 (64.3) |   | 2,377 (62.6) | 9,550 (66.6)  |   |
| ≥ 4.3 nmol/L                         | 175 (23.0) | 751 (23.8)   | - | 951 (25.0)   | 3,310 (23.1)  | - |
|                                      | Mean (SD)  |              |   | Mean (SD)    |               |   |
| Total lean mass (kg/m <sup>2</sup> ) | 16.9 (2.8) | 17.3 (2.6)   | - | 17.1 (2.9)   | 17.4 (2.8)    | - |
| Total fat mass (kg/m <sup>2</sup> )  | 9.8 (3.6)  | 8.7 (3.1)    | - | 10.4 (4.0)   | 9.3 (3.5)     | - |

SD=Standard Deviation

Depression was assessed with Center for Epidemiological Studies Depression 10 Scale, CESD ≥ 10 and/or currently undergoing treatment for depression.

\* Odds ratio derived from a multivariable logistic regression model comparing baseline characteristics of immigrant with depression versus immigrants without depression.

\*\* Odds ratio derived from a multivariable logistic regression model comparing baseline characteristics of non-immigrant with depression versus non-immigrants without depression.

\*\*\* The place of residence classification (urban or rural) was derived by CLSA based on Statistics Canada's Postal Code Conversion File where rural areas were those with a total population of less than 10,000.

---

\*\*\*\* Other provinces are Alberta, Manitoba, Nova Scotia, Prince Edward Island, Labrador and Saskatchewan

† Based on Body Mass Index international classification for adults  $\geq 18$  years of age.

‡ Weight change is defined by the question "Compared with 6 months ago, have you gained weight, lost weight, or stayed about the same?"

**Table 5: Sensitivity analysis of the association between baseline diabetes and depression at three years: missing baseline data were imputed using multiple imputation**

|                                 | Cohort 1: Depression incidence<br>N=20,723 |
|---------------------------------|--------------------------------------------|
|                                 | Adjusted OR (95% CI)                       |
| Diabetes* (Yes vs. no)          | 1.22 (1.05 – 1.41)                         |
| Immigrant (Yes vs. no)          | 1.13 (0.97 – 1.30)                         |
| Sex                             |                                            |
| Male                            | 1                                          |
| Female                          | 1.65 (1.47 - 1.85)                         |
| Age, years,                     |                                            |
| 71 - 85                         | 1                                          |
| 61 - 70                         | 0.80 (0.70 - 0.92)                         |
| 45 - 60                         | 1.01 (0.86 - 1.17)                         |
| Province                        |                                            |
| Quebec                          | 1                                          |
| British Columbia                | 0.68 (0.58 - 0.81)                         |
| Ontario                         | 0.64 (0.54 - 0.76)                         |
| Other                           | 0.78 (0.68 – 0.90)                         |
| Medical conditions (Yes vs. no) |                                            |
| Living with pain                | 1.75 (1.96 – 1.56)                         |
| Bowel disorders                 | 1.42 (1.19 – 1.68)                         |
| Smoking status                  |                                            |
| Smoker                          | 1                                          |
| Former smoker                   | 0.45 (0.38 - 0.55)                         |
| Non-smoker                      | 0.50 (0.42 - 0.61)                         |
| Weight change †                 |                                            |
| Same weight                     | 1                                          |
| Gained weight                   | 1.33 (1.14 - 1.55)                         |
| Lost weight                     | 1.31 (1.13 - 1.51)                         |
| Sleep quality                   |                                            |

Appendix 1, as supplied by the authors. Appendix to: Farid D, Li P, Da Costa D, et al. Depression, diabetes and immigration status: a retrospective cohort study using the Canadian Longitudinal Study on Aging. *CMAJ Open* 2022. DOI:10.9778/cmajo.20210019. Copyright © 2022 The Author(s) or their employer(s). To receive this resource in an accessible format, please contact us at [cmajgroup@cmaj.ca](mailto:cmajgroup@cmaj.ca).

|                                   |                    |
|-----------------------------------|--------------------|
| Satisfied or very satisfied       | 1                  |
| Neutral                           | 1.30 (1.12 - 1.52) |
| Dissatisfied or very dissatisfied | 1.87 (1.65 - 2.13) |

OR=Odds Ratio; CI=Confidence Interval;

\* The multiple imputation model adjusted for all the variables included in Table 1.

Diabetes at baseline is assessed with a positive answer to “Has a doctor ever told you that you have diabetes, borderline diabetes or that your blood sugar is higher?” At 3-year follow-up, depression is defined using CES-D-10 score  $\geq 10$  or currently taking medication for depression for cohort1.

† Weight change is defined by the question "Compared with 6 months ago, have you gained weight, lost weight, or stayed about the same?"



**Table 6: Sensitivity analysis of the association between baseline depression and diabetes at three years: missing baseline data were imputed using multiple imputation**

|                                       | Cohort 2: Diabetes incidence<br>N=22,041 |
|---------------------------------------|------------------------------------------|
|                                       | Adjusted OR (95% CI)                     |
| Depression* (Yes vs. no)              | 1.31 (1.12 - 1.54)                       |
| Immigrant (Yes vs. no)                | 0.96 (0.80 - 1.15)                       |
| Sex                                   |                                          |
| Male                                  | 1                                        |
| Female                                | 1.21 (1.05 - 1.40)                       |
| Age, years,                           |                                          |
| 45 - 60                               | 1                                        |
| 61 - 70                               | 0.95 (0.82– 1.27)                        |
| 71 - 85                               | 0.73 (0.60 – 0.89)                       |
| Province                              |                                          |
| Quebec                                | 1                                        |
| British Columbia                      | 1.13 (0.92 – 1.39)                       |
| Ontario                               | 0.99 (0.81 – 1.21)                       |
| Other                                 | 0.75 (0.62 – 0.90)                       |
| Medical conditions (Yes vs. no)       |                                          |
| Hypertension                          | 1.25 (1.05 – 1.49)                       |
| Heart disease                         | 1.43 (1.20 – 1.69)                       |
| Waist circumference risk (Yes vs. no) | 2.21 (1.91- 2.56)                        |
| Weight change †                       |                                          |
| Same weight                           | 1                                        |
| Gained weight                         | 0.99 (1.12 - 1.43)                       |
| Lost weight                           | 1.25 (1.06 - 1.49)                       |

OR=Odds Ratio; CI=Confidence Interval;

\* The multiple imputation model adjusted for all the variables included in Table 1.

Depression is assessed with Center for Epidemiological Studies Depression 10 Scale, CESD  $\geq 10$  or currently taking medication for depression or following any other treatments for depression. 3-year incident diabetes is defined using self-reported diabetes diagnosis.

† Weight change is defined by the question "Compared with 6 months ago, have you gained weight, lost weight, or stayed about the same?"

## References

1. Sherbourne CD, Stewart AL. The MOS social support survey. *Soc Sci Med*. 1991;32(6):705-14.
2. Canadian longitudinal study on aging. Data Support Document of urban/rural classification 2018 [Available from: [https://www.clsa-elcv.ca/sites/default/files/documents/urbanrural\\_dsd\\_01\\_03\\_2018\\_final.pdf](https://www.clsa-elcv.ca/sites/default/files/documents/urbanrural_dsd_01_03_2018_final.pdf)].
3. WHO. Physical status: the use and interpretation of anthropometry. Report of a WHO Expert Committee. Geneva: World Health Organization; 1995 [
4. World Health Organization. Waist circumference and waist-hip ratio : report of a WHO expert consultation. Geneva; 2008.
5. Keller HH, Goy R, Kane SL. Validity and reliability of SCREEN II (Seniors in the community: risk evaluation for eating and nutrition, Version II). *Eur J Clin Nutr*. 2005;59(10):1149-57.
